# Supplementary material for: Islet Brain 1 Protects Insulin Producing Cells against Lipotoxicity
Source: PubMed Central journal article supplement (PMC4655268; doi:10.1155/2016/9158562), 2015-11-09

**Supplementary Fig. 1. a)** Quantification of I $\beta$ 1 by Western Blotting in cells in which the Atf3 level was over-produced by transient transfection of the plasmid coding for Aft3 (pAtf3). The bars of the graph below correspond to the quantification of the *Ib1* mRNA by quantitative PCR in MIN6 cells transfected with Atf3 or the empty vector (Ctrl). The mRNA levels were normalized against the *Rplp0* and the expression levels from wild type islets were set to 100%. Data are the mean of  $\pm$  SEM of 3 independent experiments. **b)** Measurement of I $\beta$ 1 content in islets of Atf3 knockout mice. Quantification of I $\beta$ 1 by Western Blotting in isolated islet cells from wild type littermates and Atf3 knockout mice (Atf3<sup>-/-</sup>) that were incubated with thapsigargin (Thaps) for the indicated times. The bars of the graph below correspond to the quantification of the *Ib1* mRNA by qRT-PCR. The mRNA levels were normalized against the *Rplp0* and the expression levels from wild type islets were set to 100%.

**a**

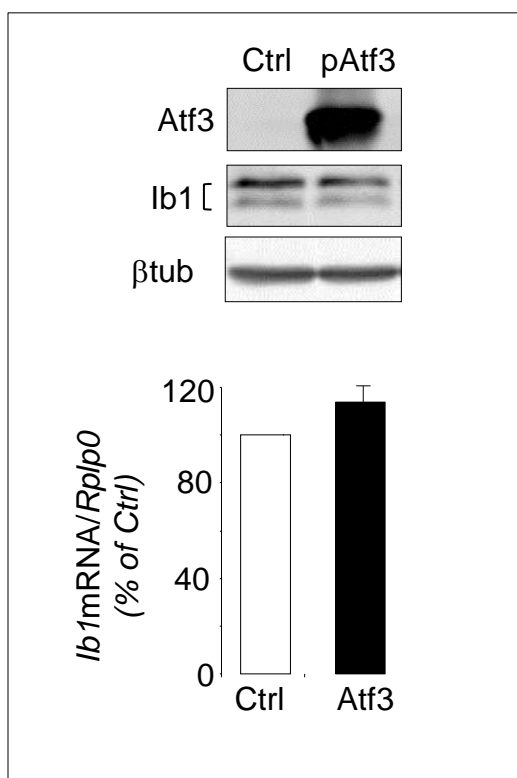

**b**

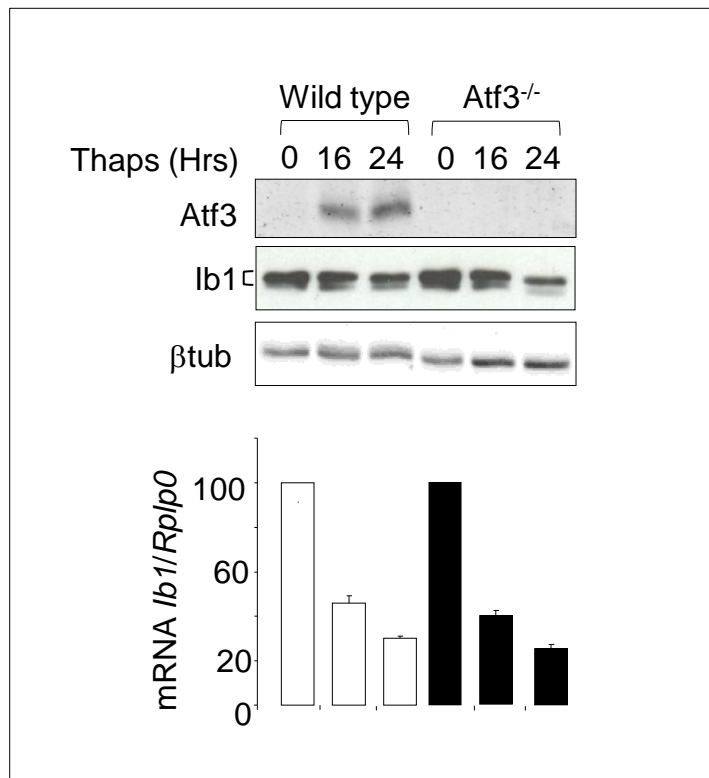

Supplement: 9158562.f1.pdf [file 9158562.f1.pdf]
